# Supplementary material for: SRPK1 acetylation modulates alternative splicing to regulate cisplatin resistance in breast cancer cells
Source: PubMed Central journal article supplement (PMC7253463; doi:10.1038/s42003-020-0983-4), 2020-05-27
Supplement: 42003_2020_983_MOESM4_ESM.pdf [file 42003_2020_983_MOESM4_ESM.pdf]

## **Description of Additional Supplementary Files**

**File Name: Supplementary Data 1**

**Description:** This file includes the data presented in the bar graphs of the main figures.

**File Name: Supplementary Data 2**

**Description:** This file includes the potential post-translational modifications identified in SRPK1.
